# Supplementary material for: Extracting a low-dimensional description of multiple gene expression datasets reveals a potential driver for tumor-associated stroma in ovarian cancer
Source: PubMed Central journal article supplement (PMC4902951; doi:10.1186/s13073-016-0319-7), 2016-06-10

Figure S3

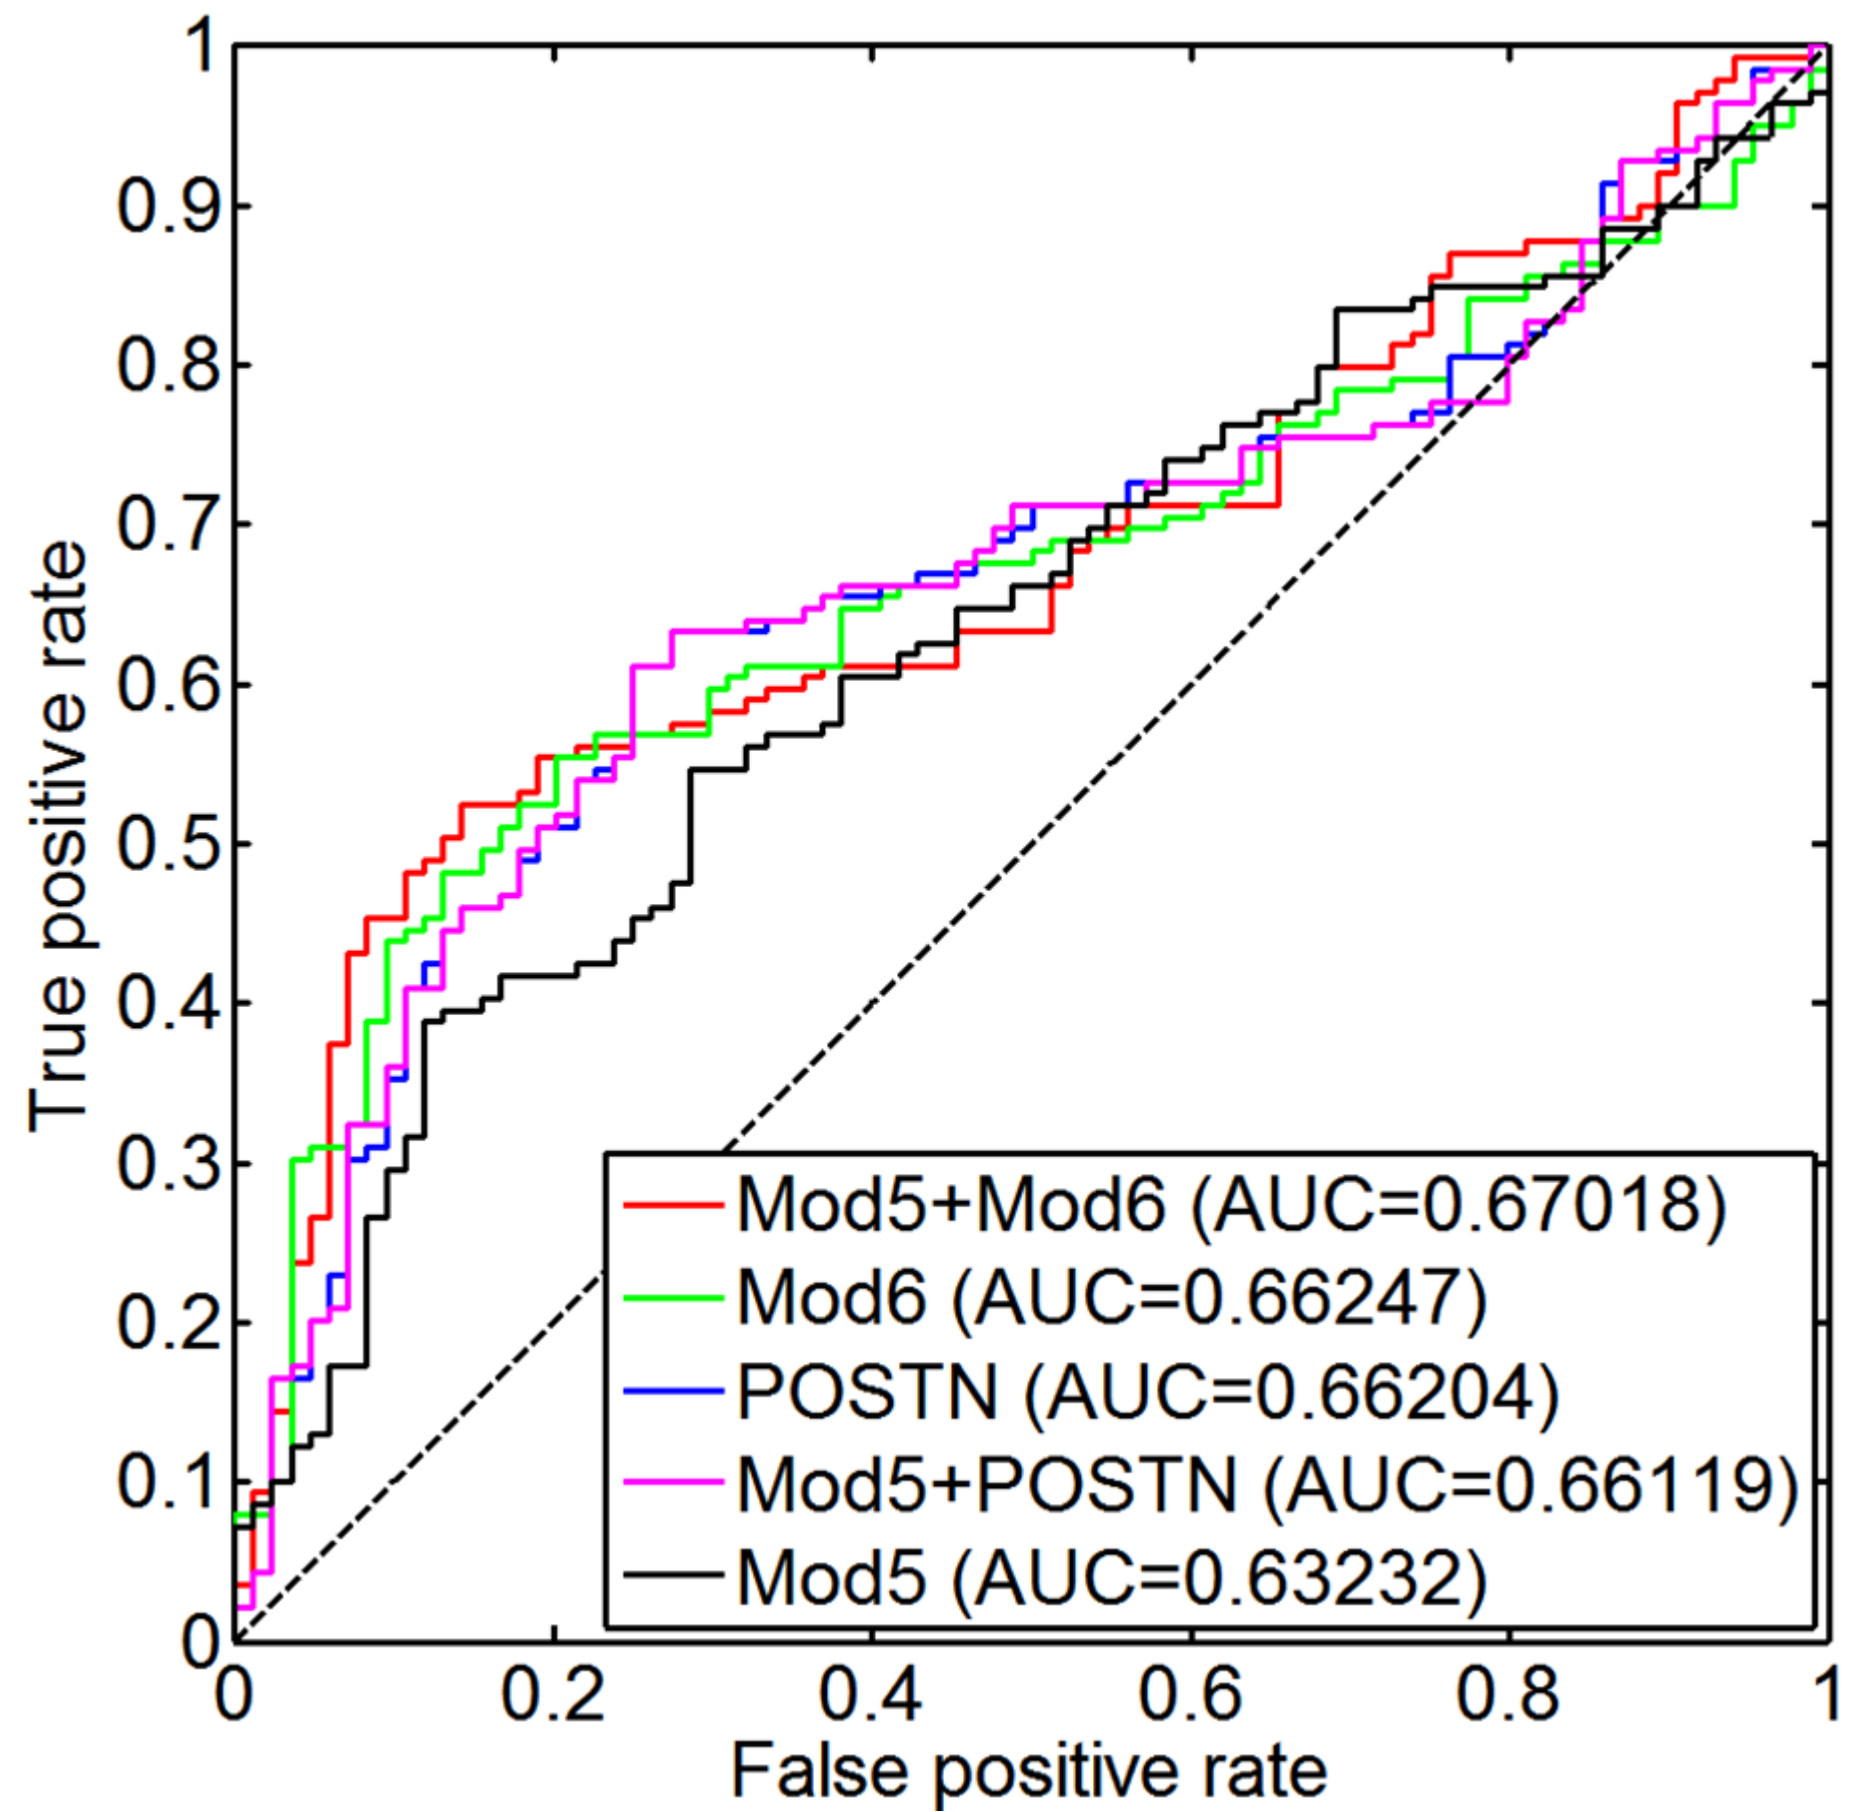

Supplement: 13073_2016_319_MOESM4_ESM.pdf [file 13073_2016_319_MOESM4_ESM.pdf]
