# Supplementary material for: Extracting a low-dimensional description of multiple gene expression datasets reveals a potential driver for tumor-associated stroma in ovarian cancer
Source: PubMed Central journal article supplement (PMC4902951; doi:10.1186/s13073-016-0319-7), 2016-06-10

Figure S6A

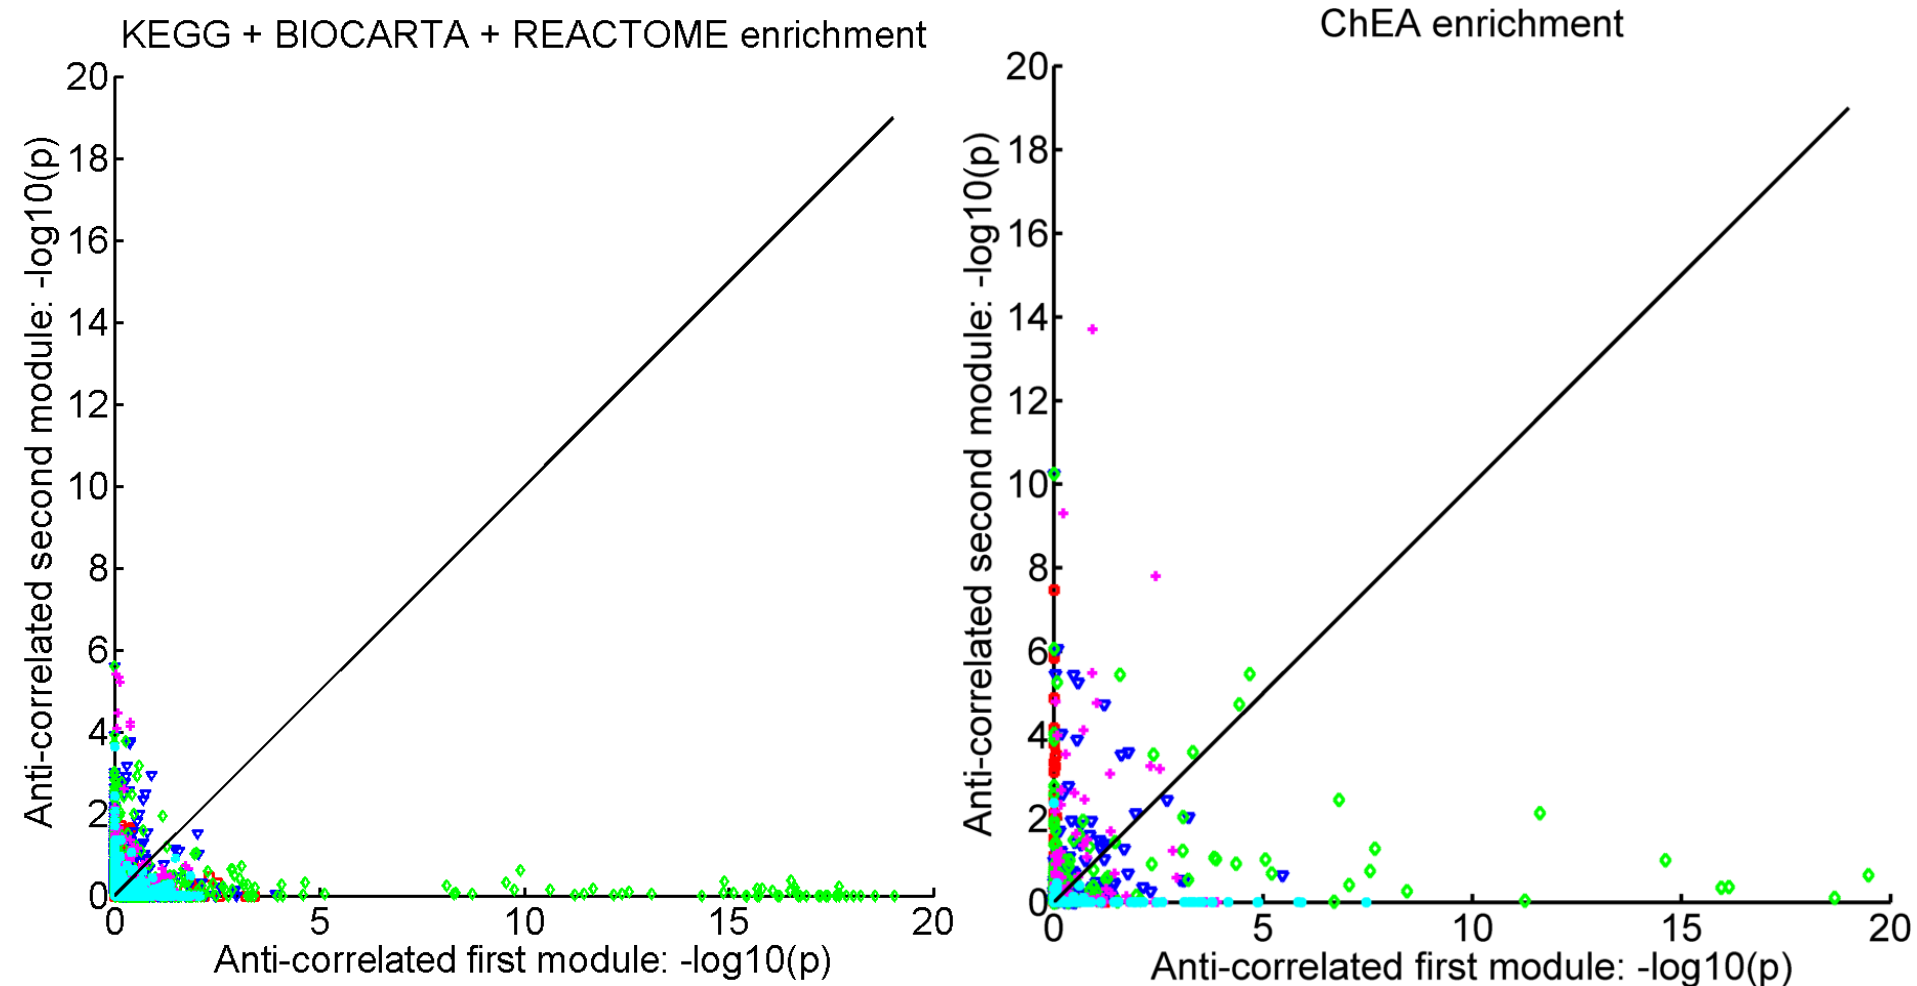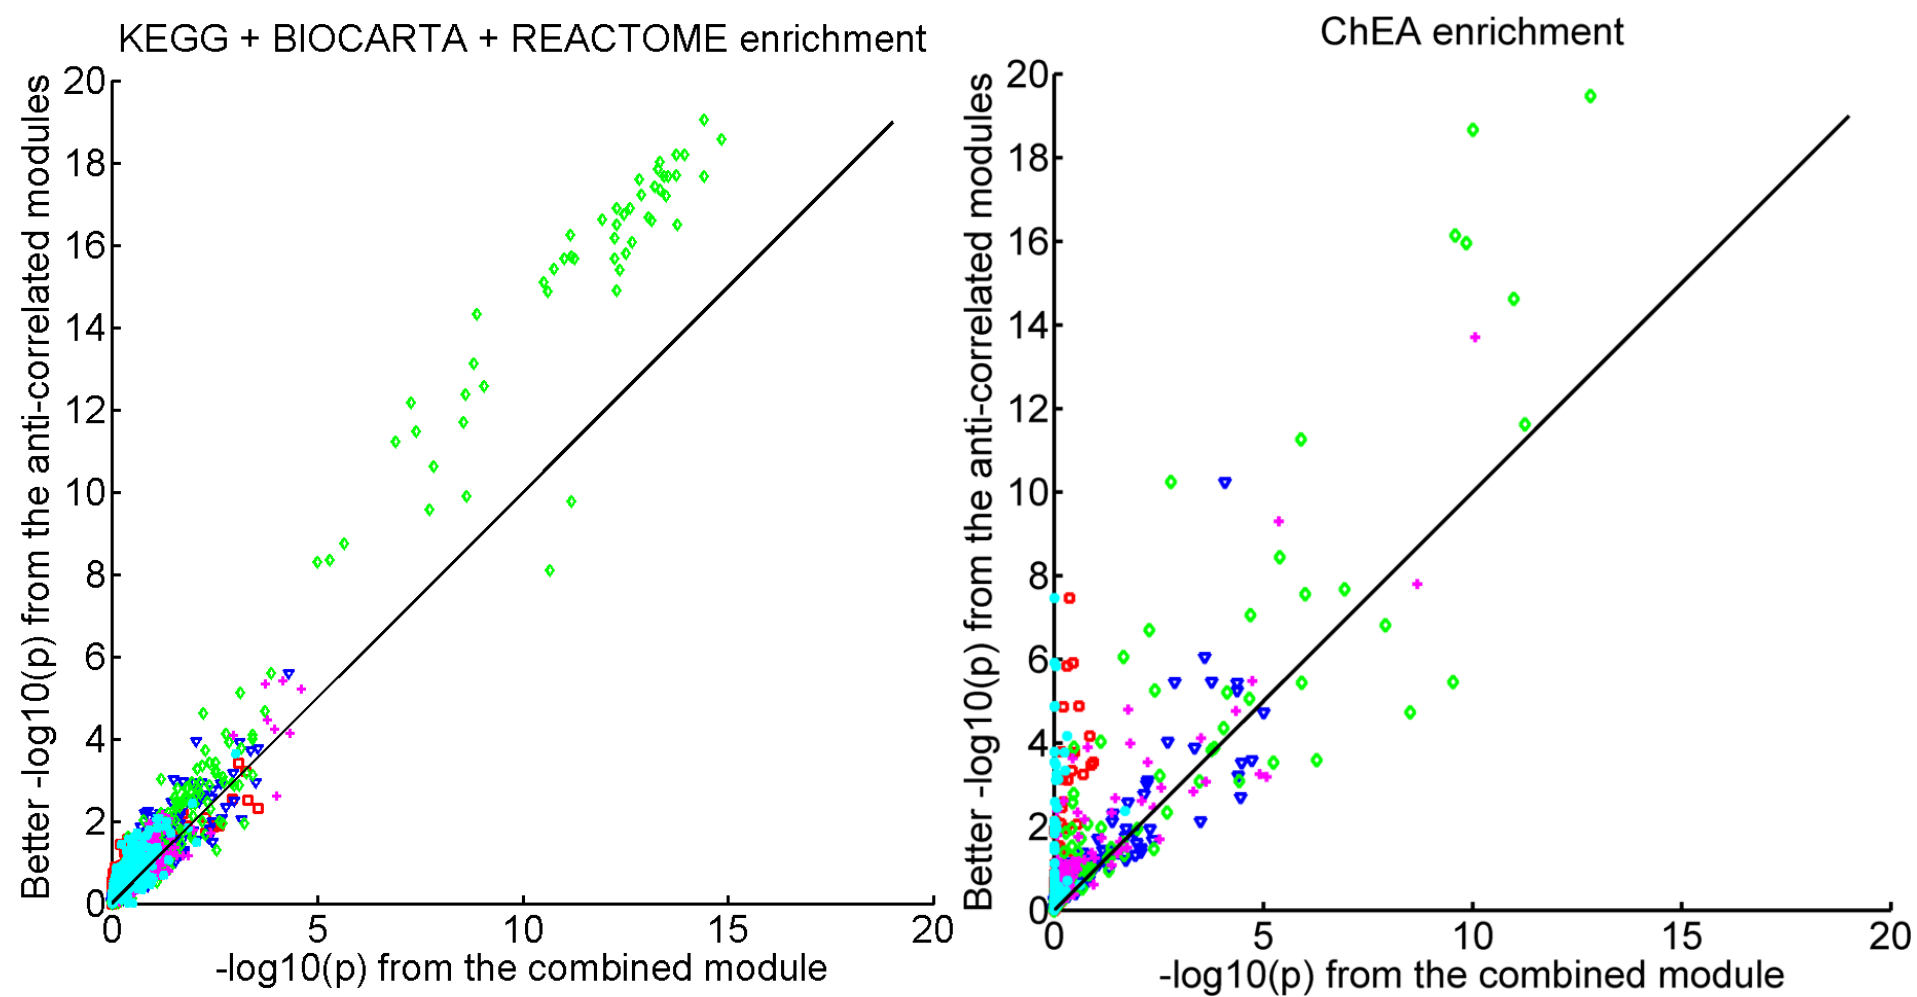

- modules 8 & 11: -0.85
- ▼ modules 12 & 47: -0.8
- ◇ modules 10 & 47: -0.8
- ✦ modules 7 & 50: -0.8
- modules 11 & 74: -0.75

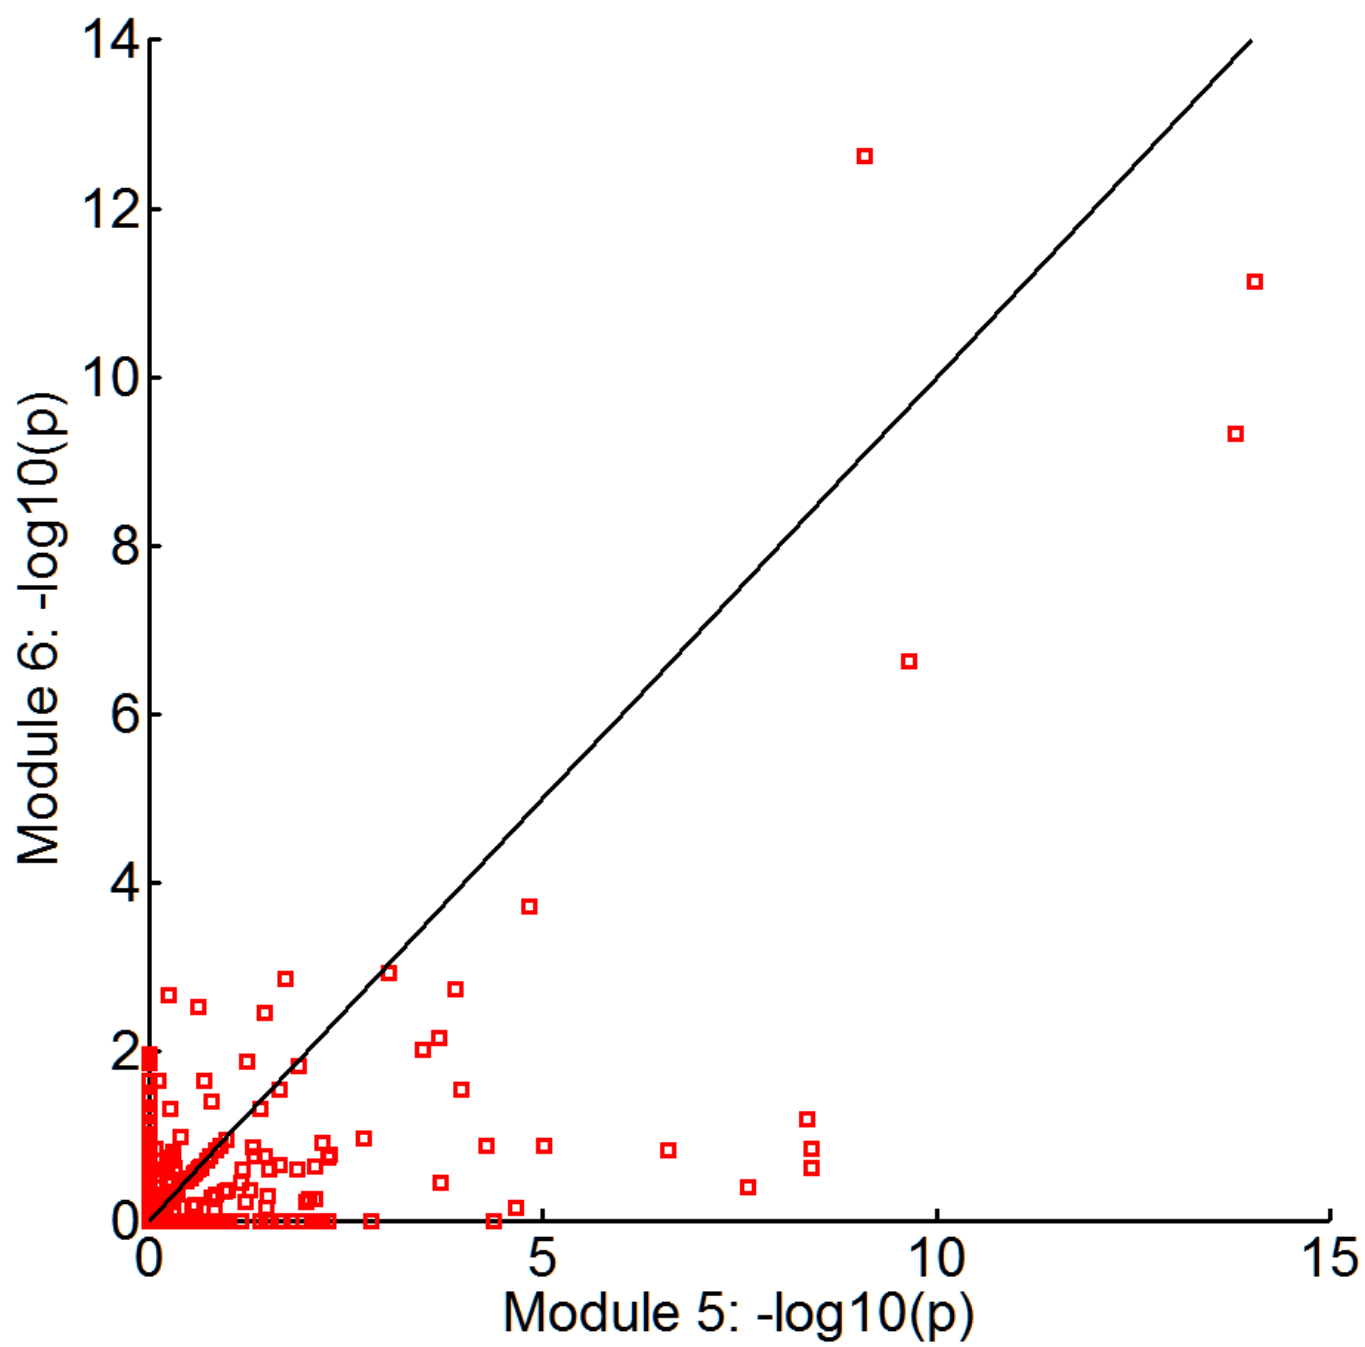

ChEA enrichment

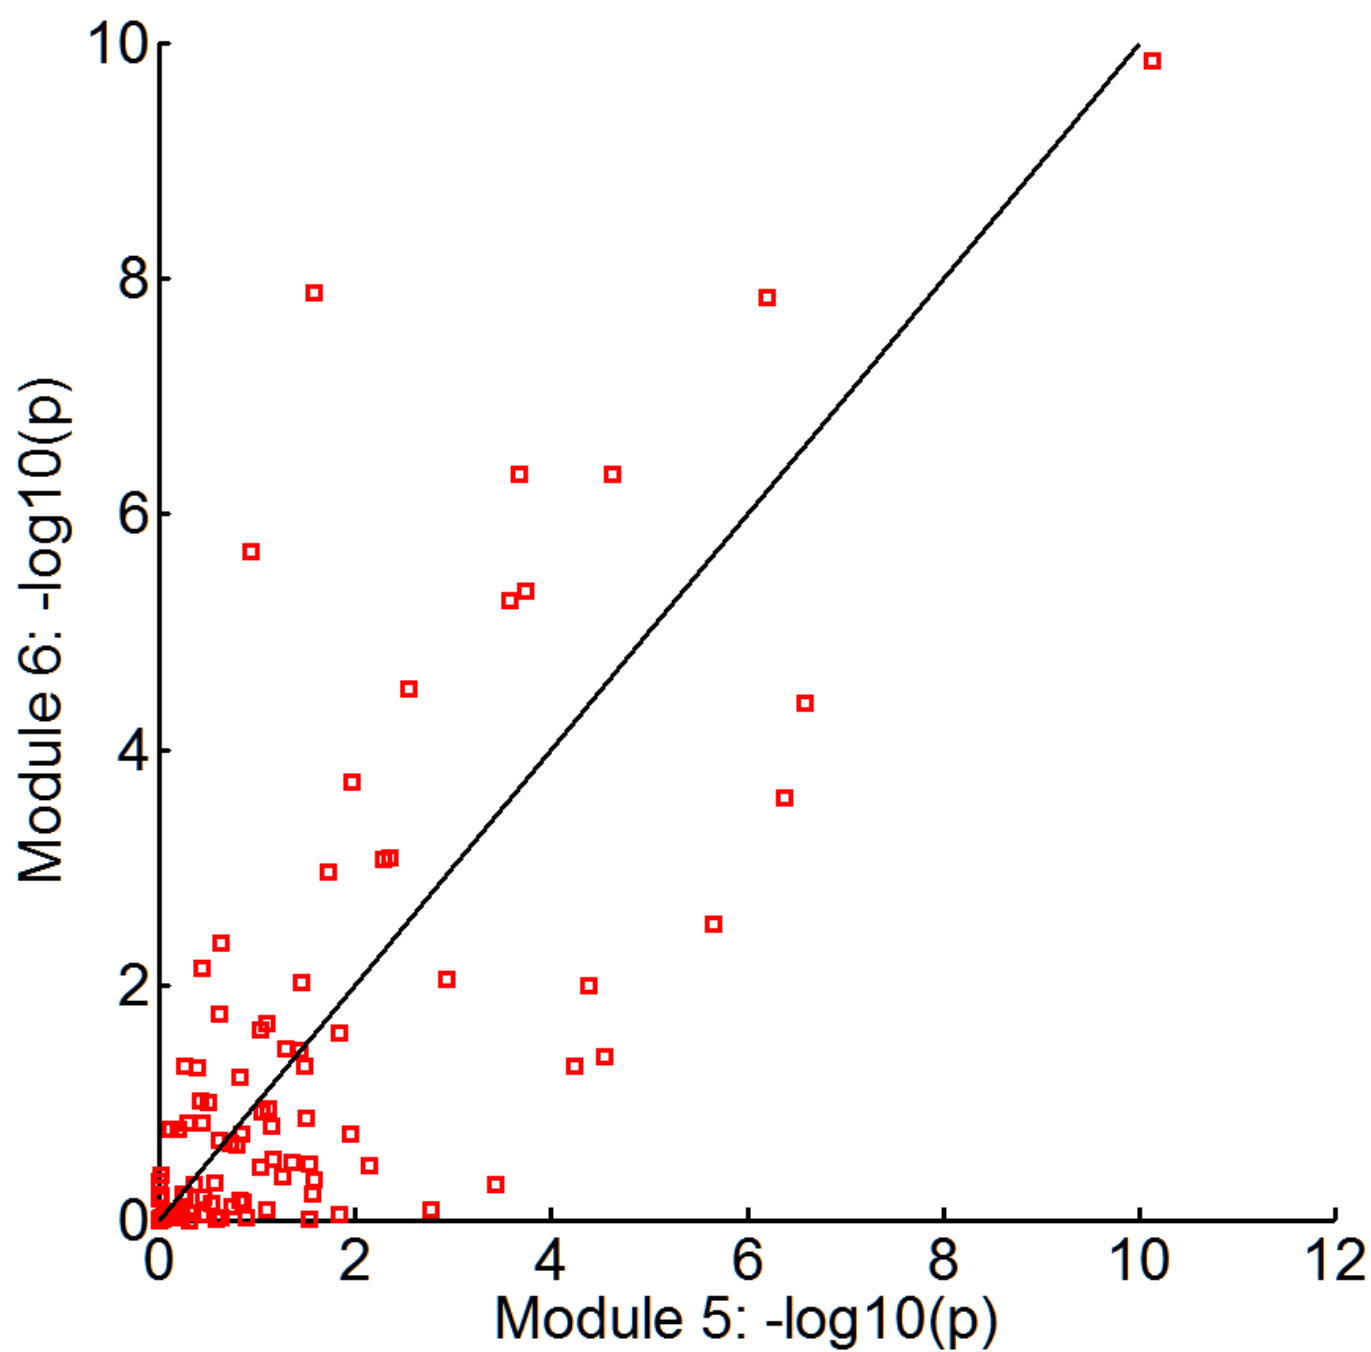

Supplement: 13073_2016_319_MOESM10_ESM.pdf [file 13073_2016_319_MOESM10_ESM.pdf]
