# Supplementary material for: Extracting a low-dimensional description of multiple gene expression datasets reveals a potential driver for tumor-associated stroma in ovarian cancer
Source: PubMed Central journal article supplement (PMC4902951; doi:10.1186/s13073-016-0319-7), 2016-06-10

Nuclei, HOPX, E-cadherin

Nuclei, HOPX, CD73

Optimal

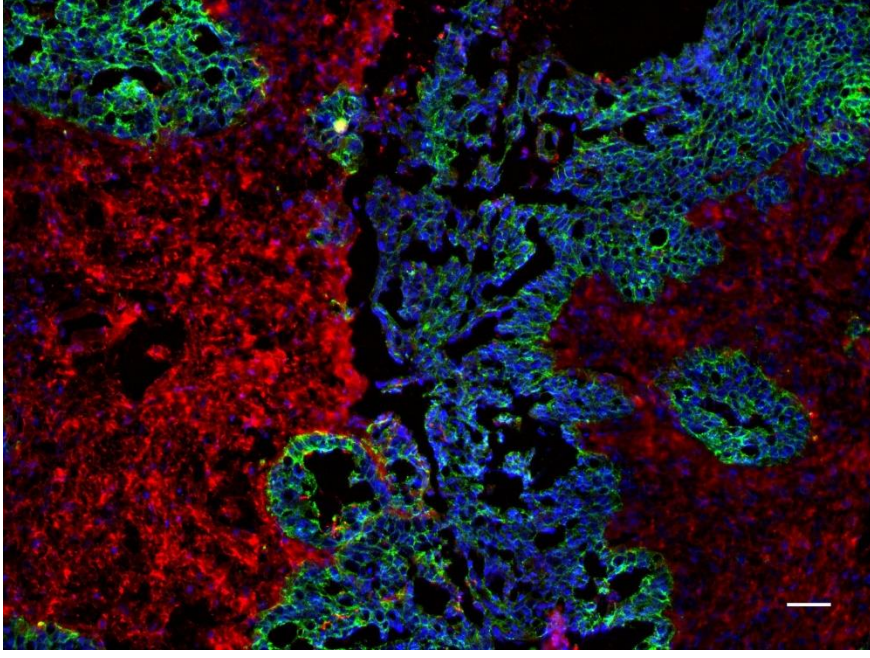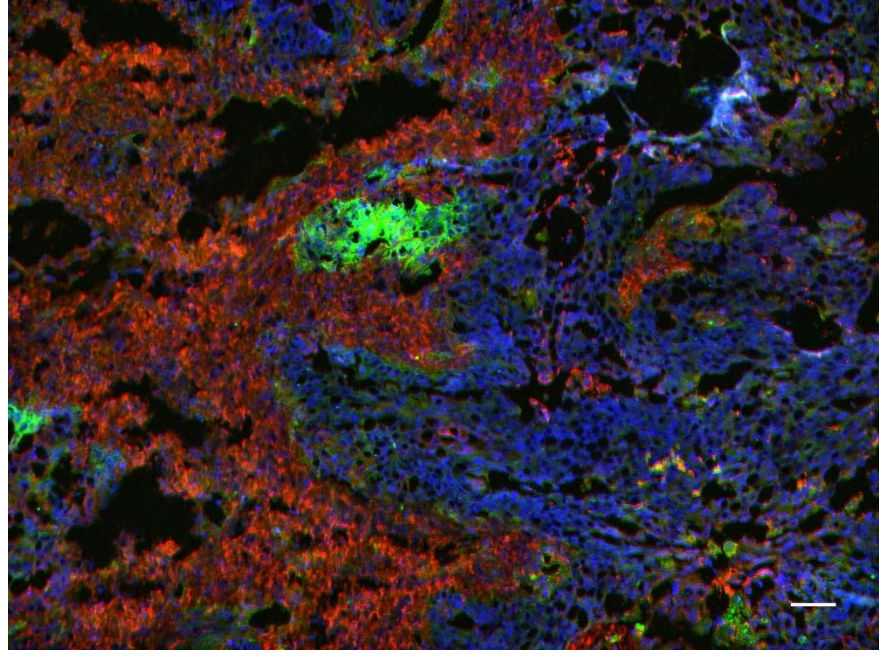

Sub-optimal

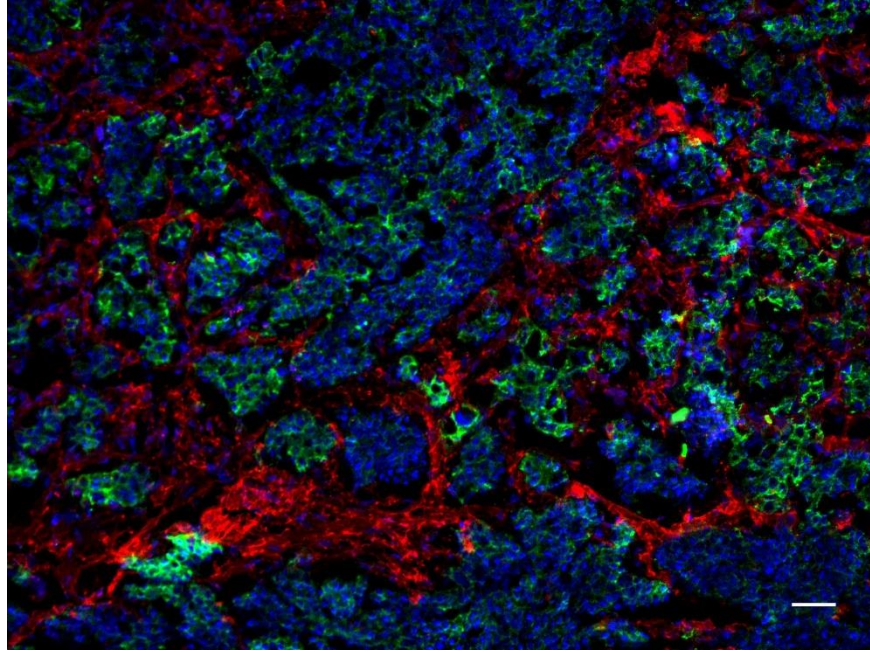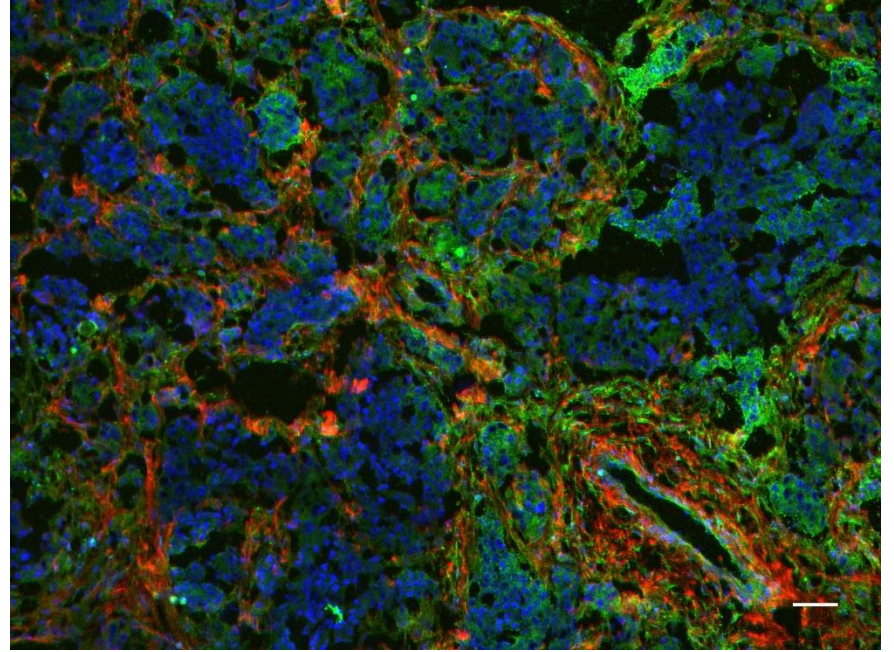

Nuclei, HOPX, E-cadherin

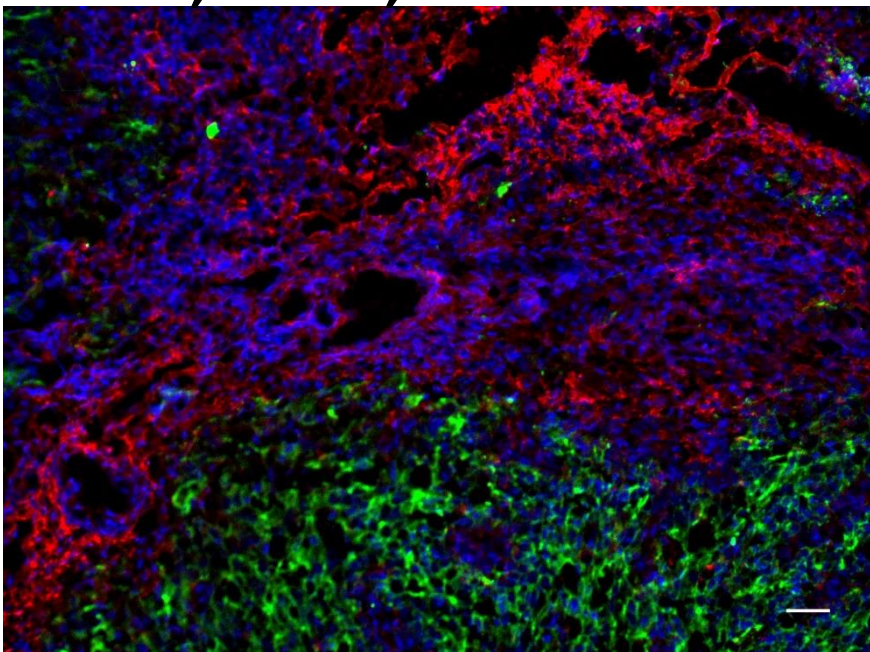

Nuclei, HOPX, CD73

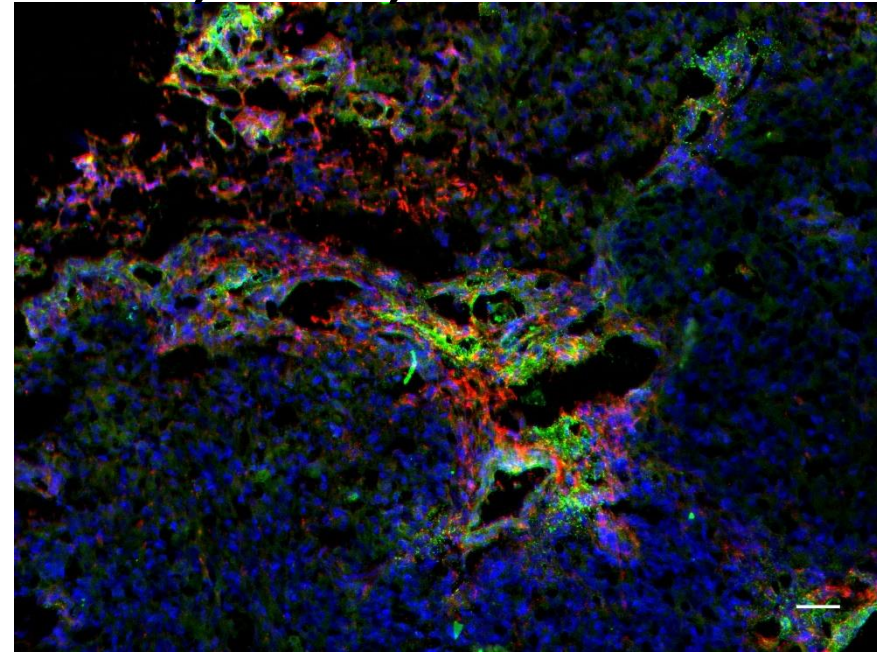

Sub-optimal

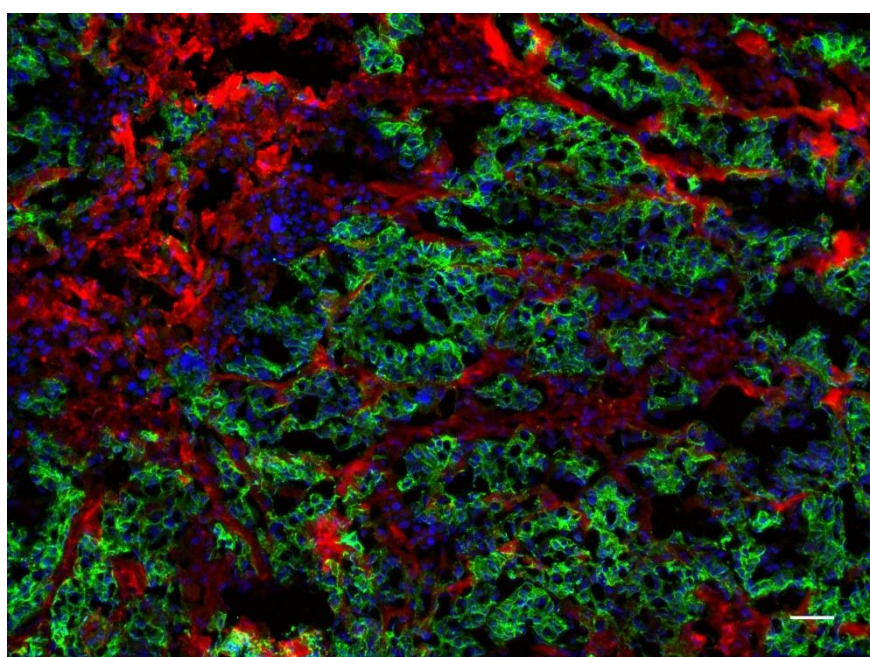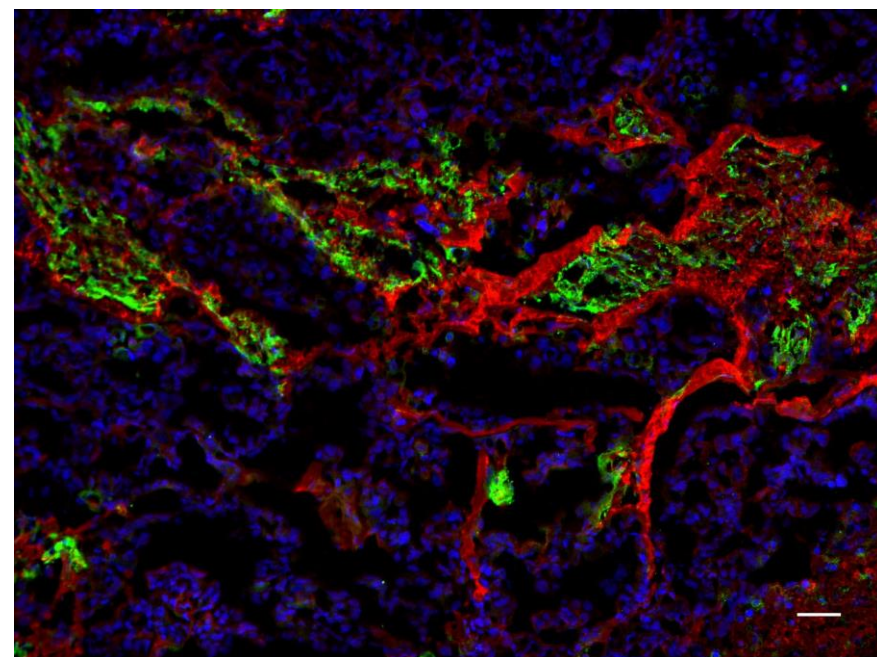

(i)

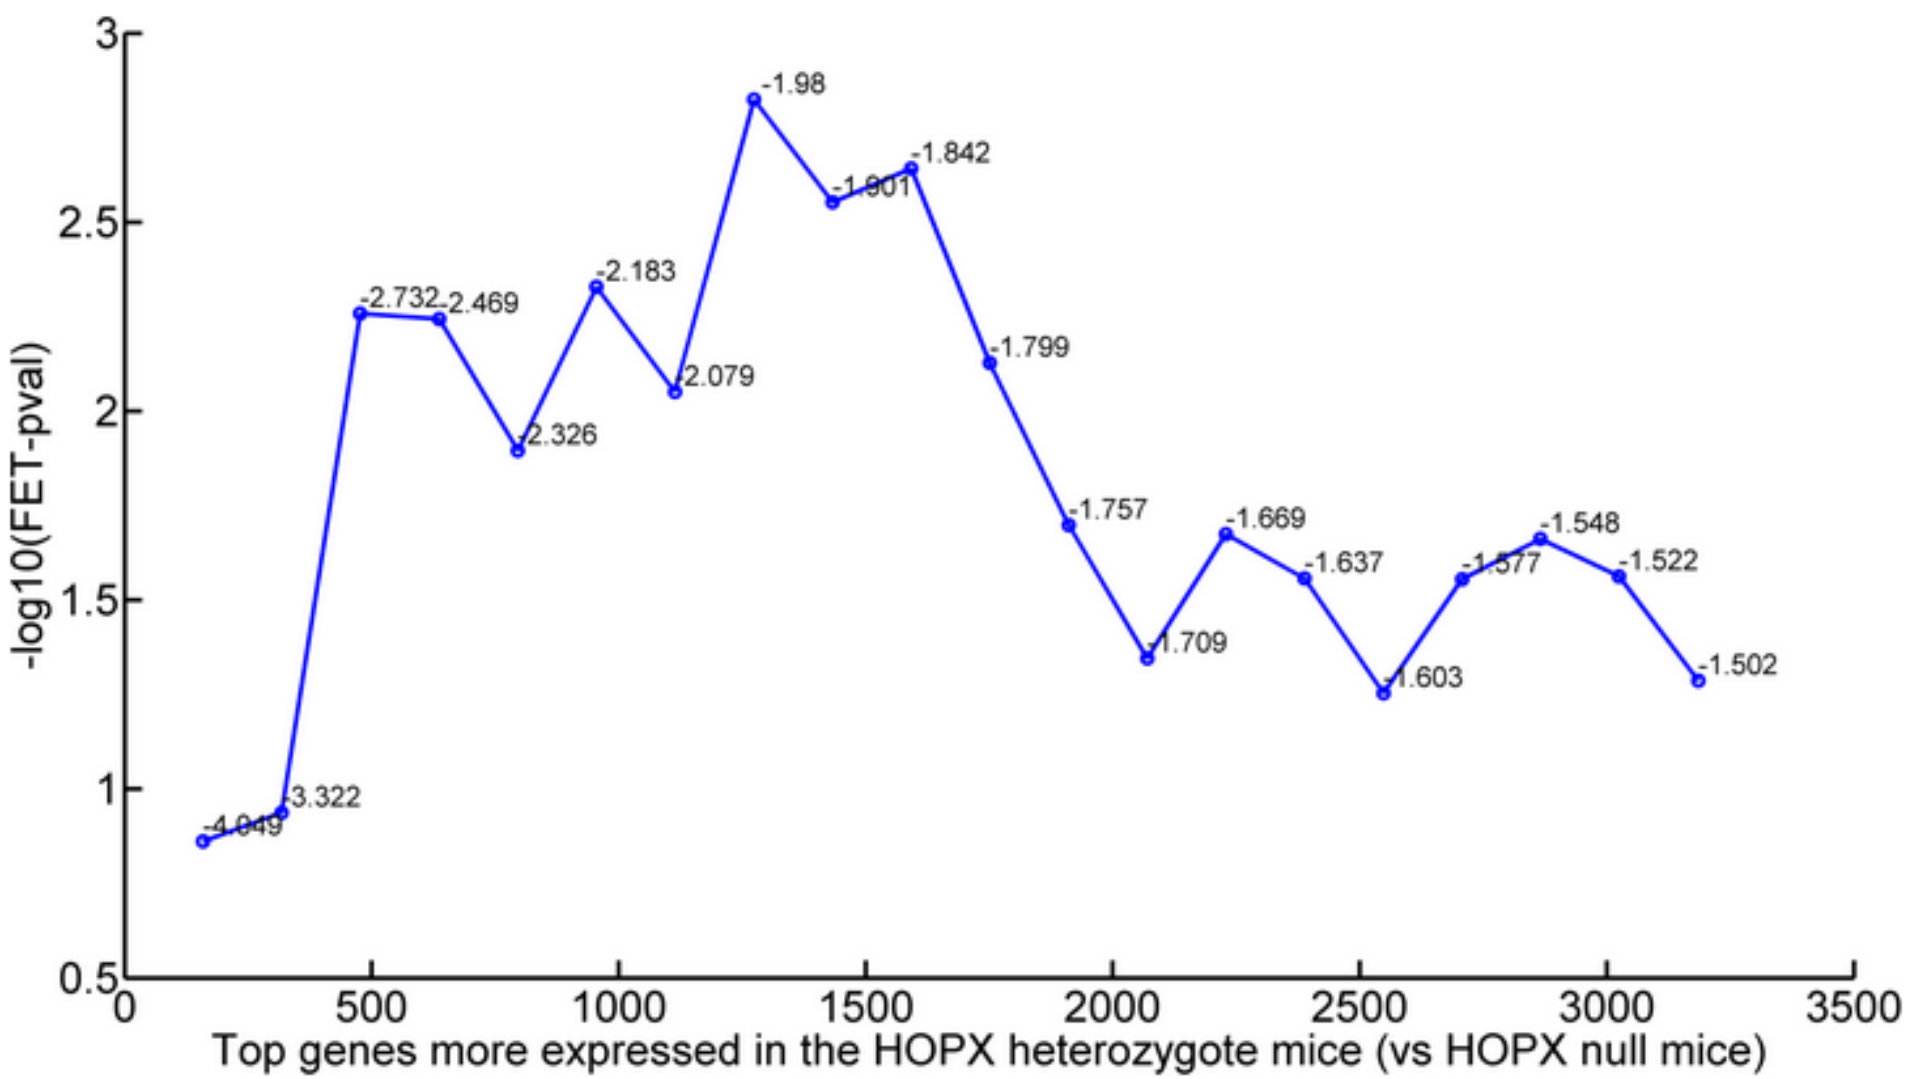

(ii)

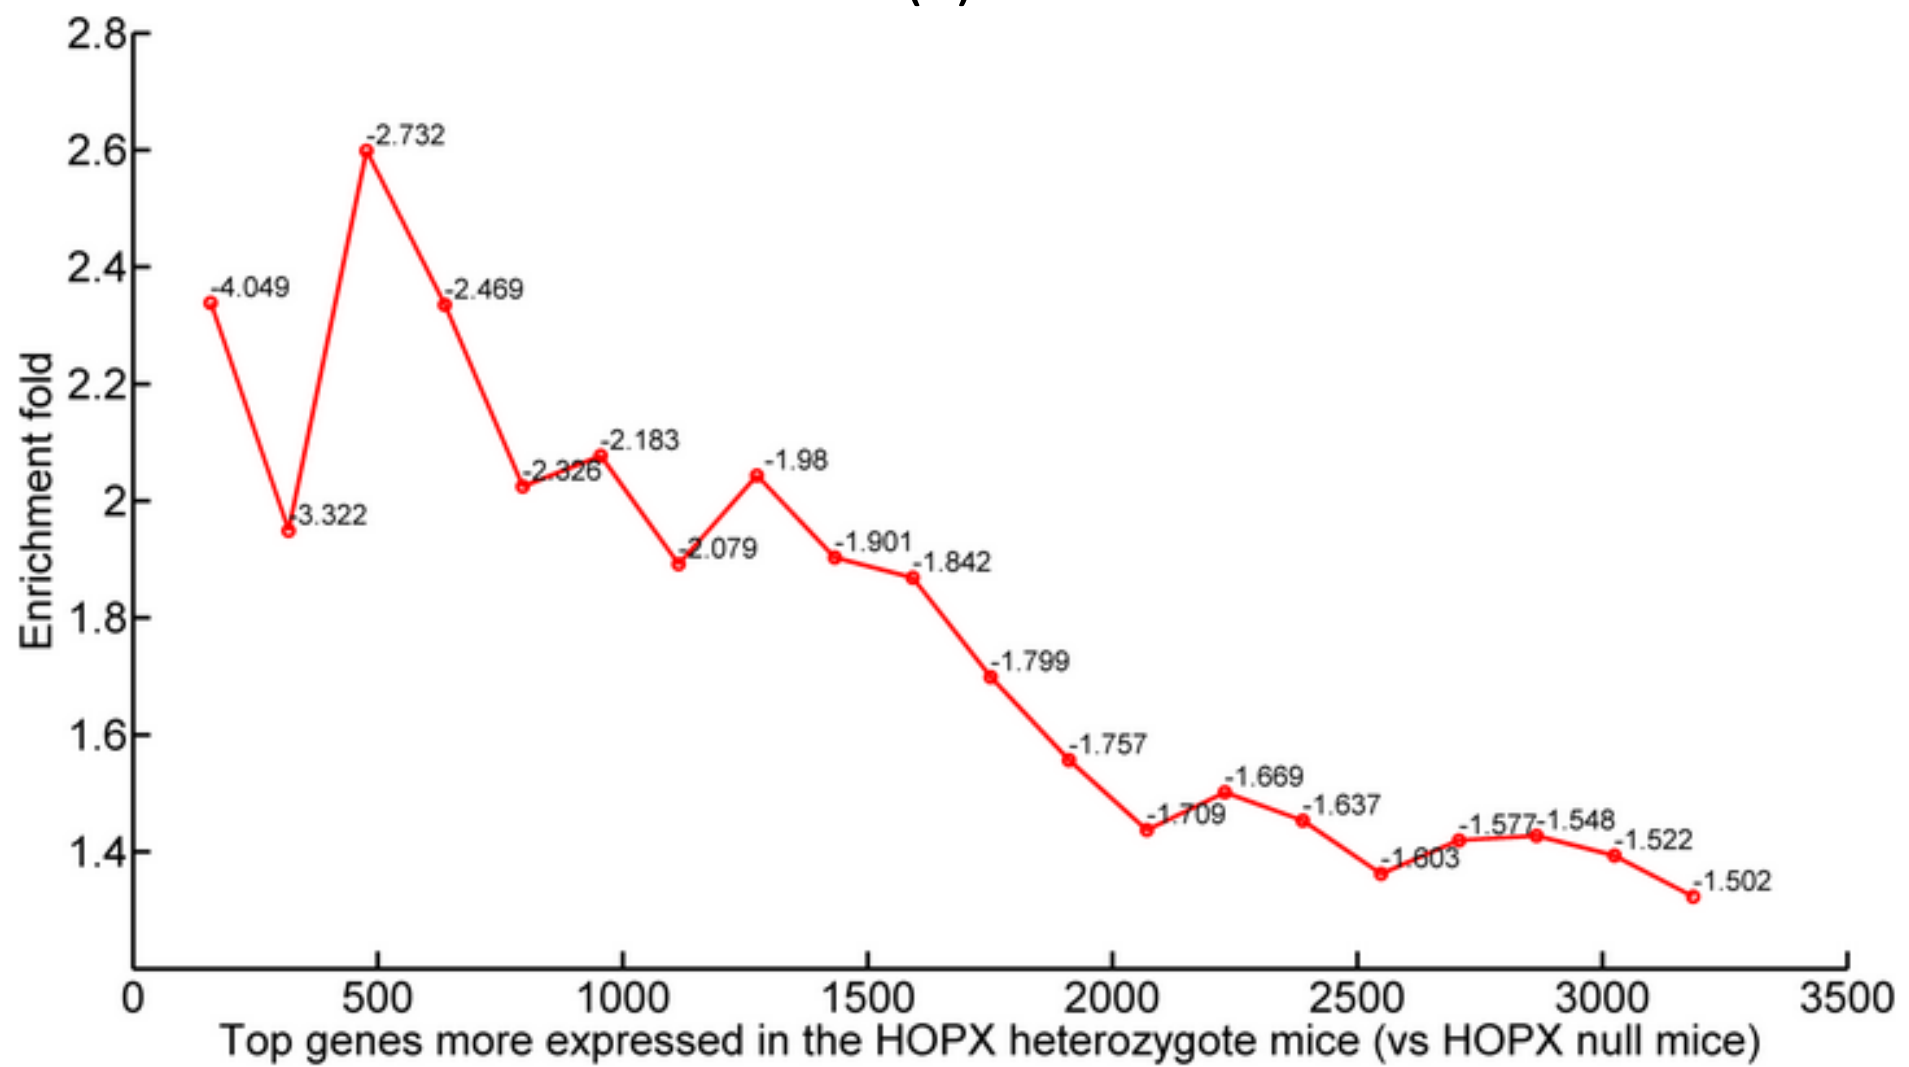

(i)

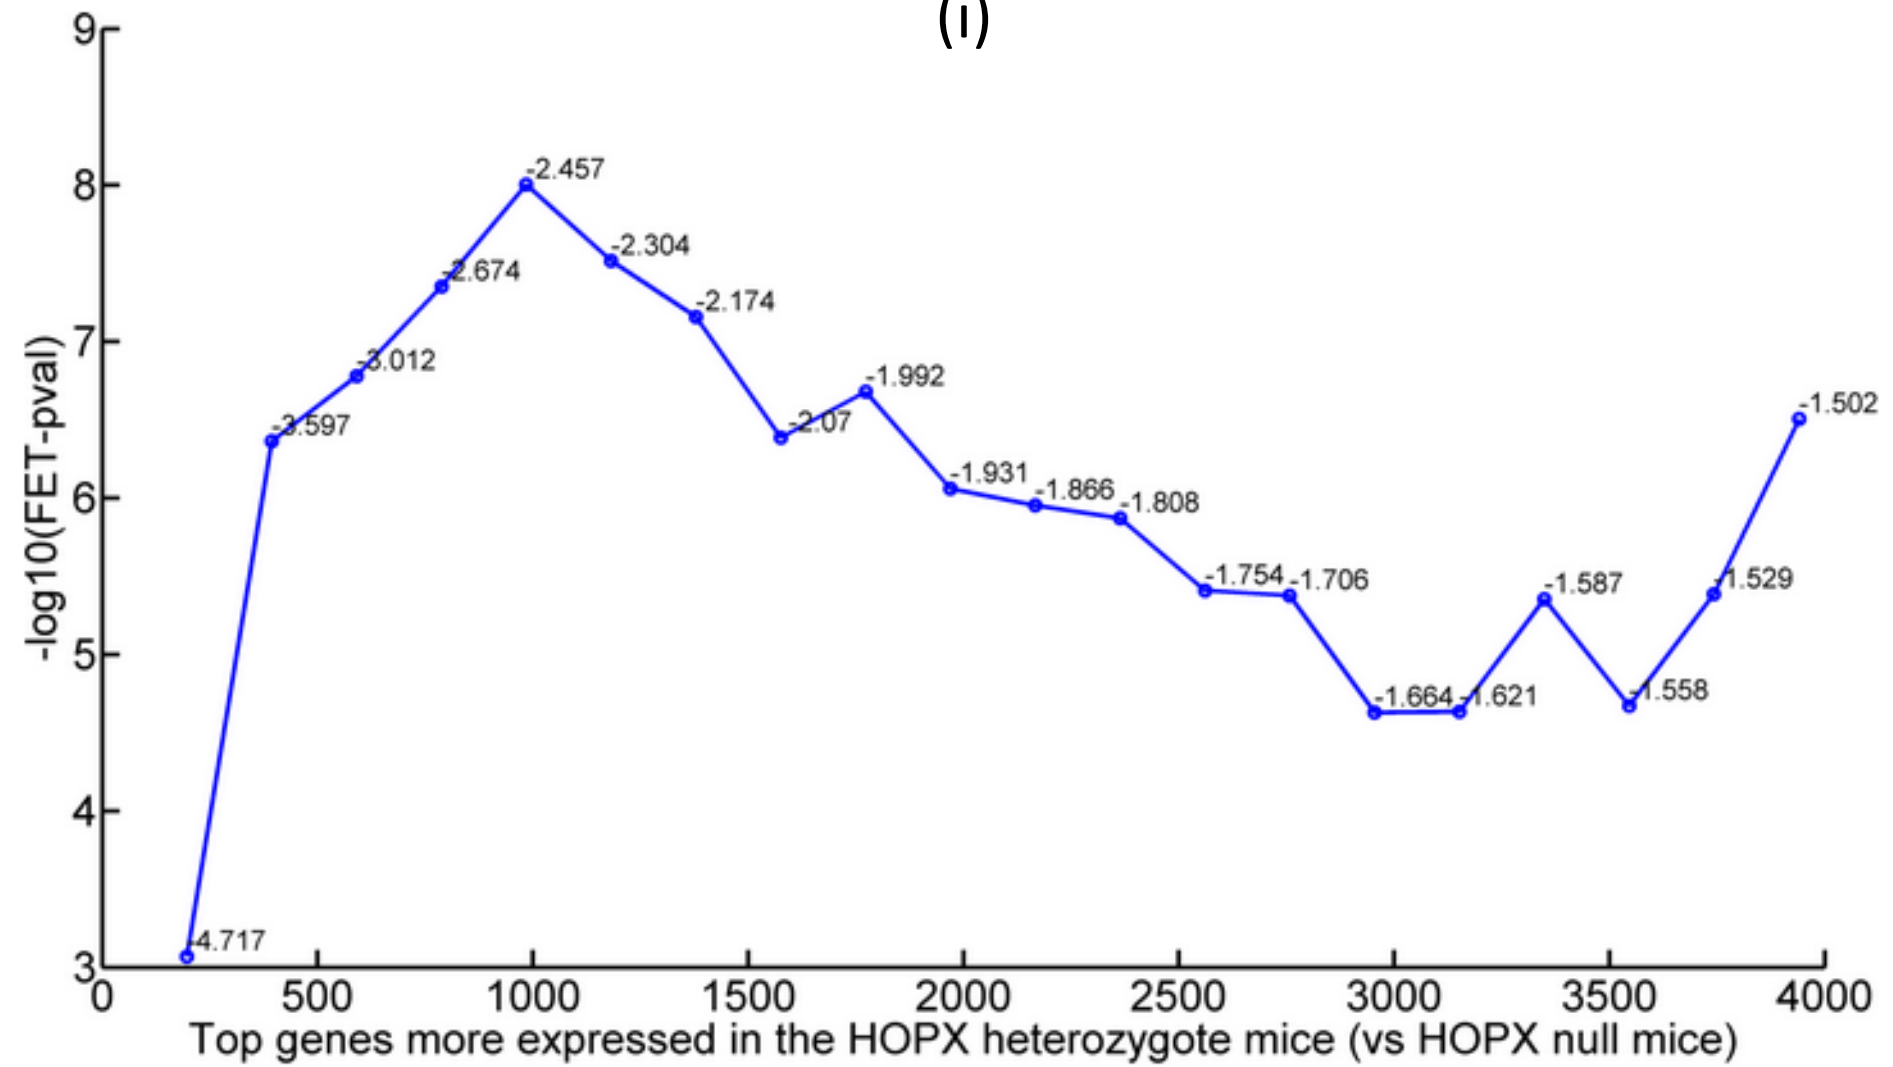

(ii)

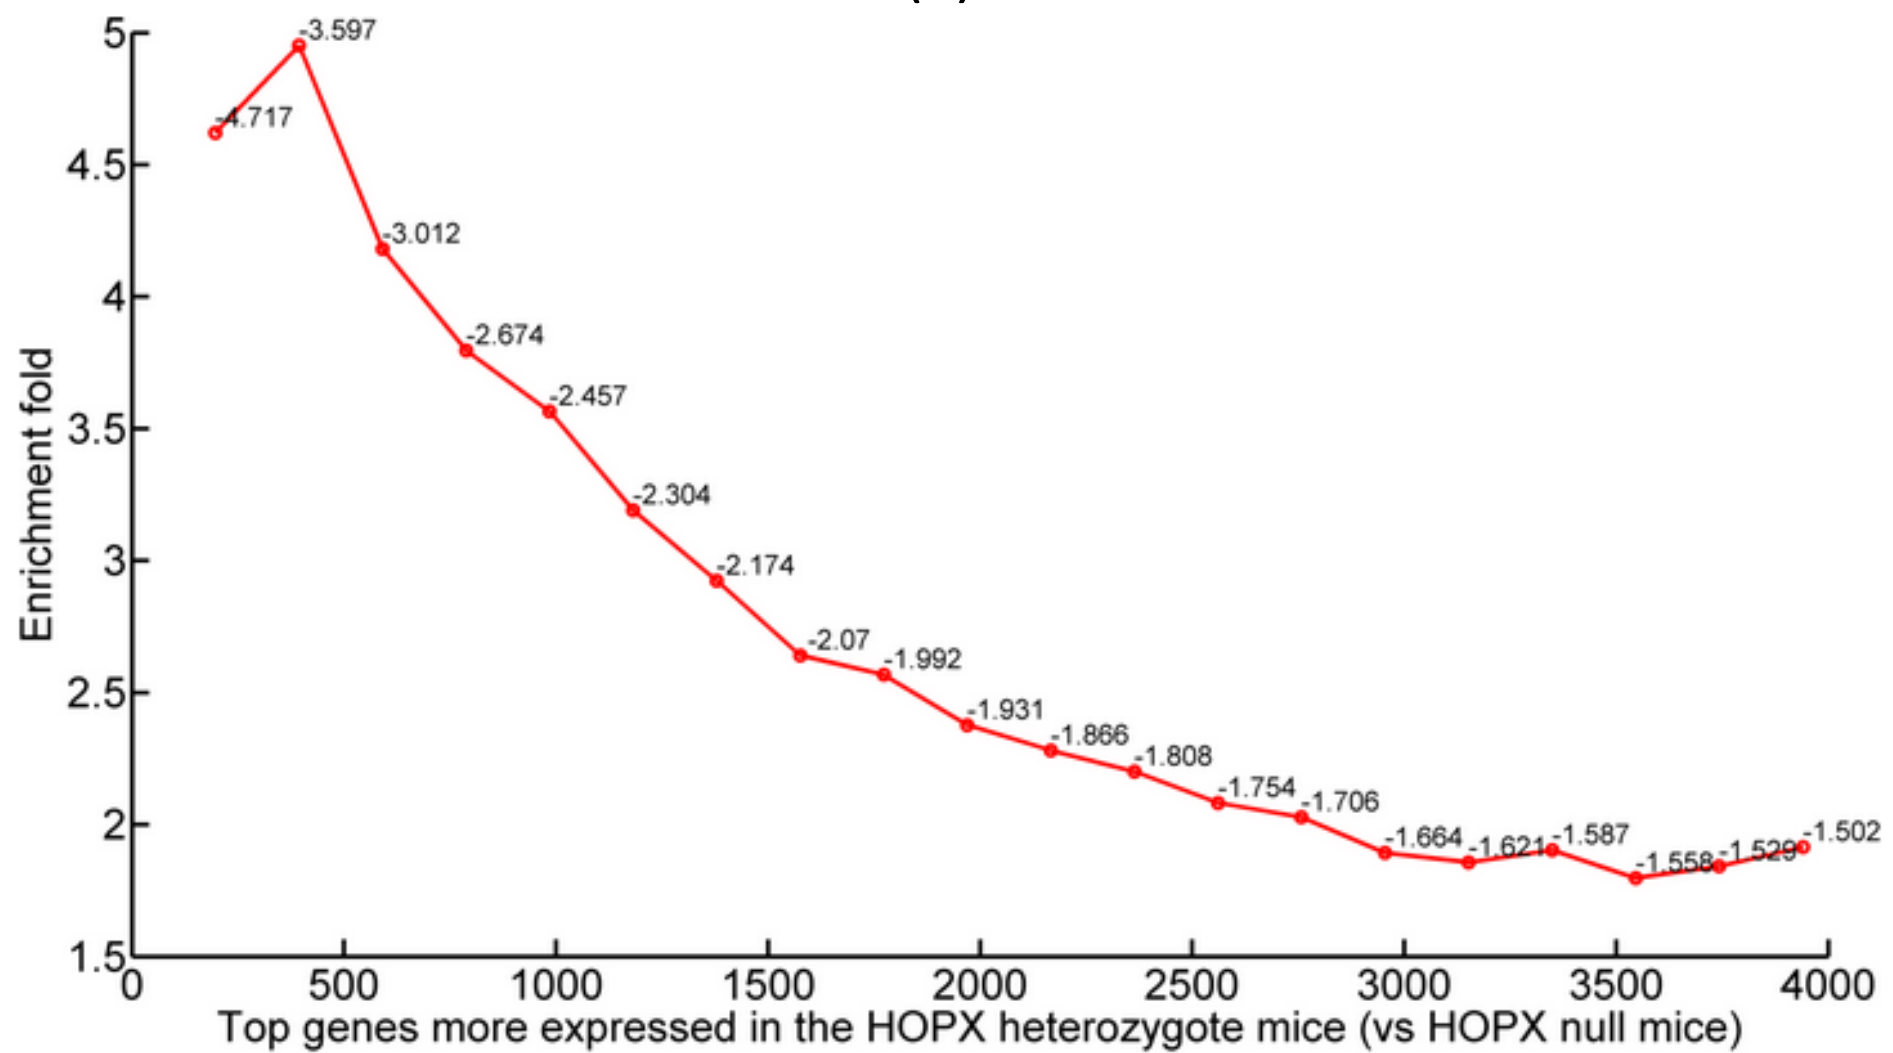

Supplement: 13073_2016_319_MOESM22_ESM.pdf [file 13073_2016_319_MOESM22_ESM.pdf]
